# Supplementary material
Source: PubMed Central journal article supplement (PMC5438056)
Supplement: ULT690942_supplementary_material.pdf [file ULT690942_supplementary_material.pdf]

## SUPPLEMENTARY MATERIAL

| PARITY | N   | Mean MFV | Standard dev. |
|--------|-----|----------|---------------|
| 0      | 10  | 78.1833  | 14.46733      |
| 1      | 454 | 75.4234  | 14.60467      |
| 2      | 281 | 70.9353  | 12.12312      |
| 3      | 80  | 68.1944  | 9.65847       |
| 4      | 21  | 70.4341  | 18.15267      |
| 5      | 9   | 69.2222  | 18.99854      |
| 6      | 4   | 69.9187  | 12.38045      |
| Total  | 859 | 73.1016  | 13.79344      |

Supplementary Table 1: averaged MFV (cm/sec) according to parity

| PARITY | N   | Mean    | Standard dev. |
|--------|-----|---------|---------------|
| 0 -1   | 464 | 75.4829 | 14.59174      |
| >1     | 395 | 70.3042 | 12.23070      |
| Total  | 859 | 73.1016 | 13.79344      |

Supplementary Table 2: averaged MFV (cm/sec) according to dichotomized parity

|        |                       | PARITY  | AGE     |
|--------|-----------------------|---------|---------|
| PARITY | Pearson's Correlation | 1       | 0.299** |
|        | Sign. (TWO TAILED)    |         | 0.0001  |
|        | N                     | 891     | 882     |
| AGE    | Pearson's Correlation | 0.299** | 1       |
|        | Sign. (TWO TAILED)    | 0.0001  |         |
|        | N                     | 882     | 889     |

Supplementary Table 3: Correlation between AGE and PARITY

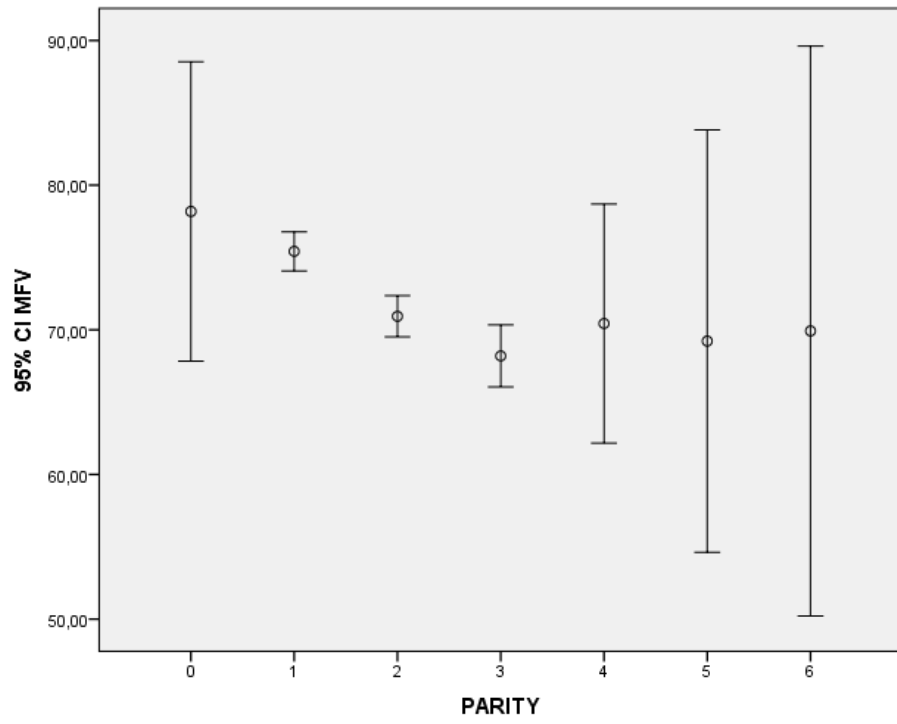

Supplementary Figure 1: Parity plotted against MFV (cm/sec): circles represent means, vertical bars 95% C.I.s

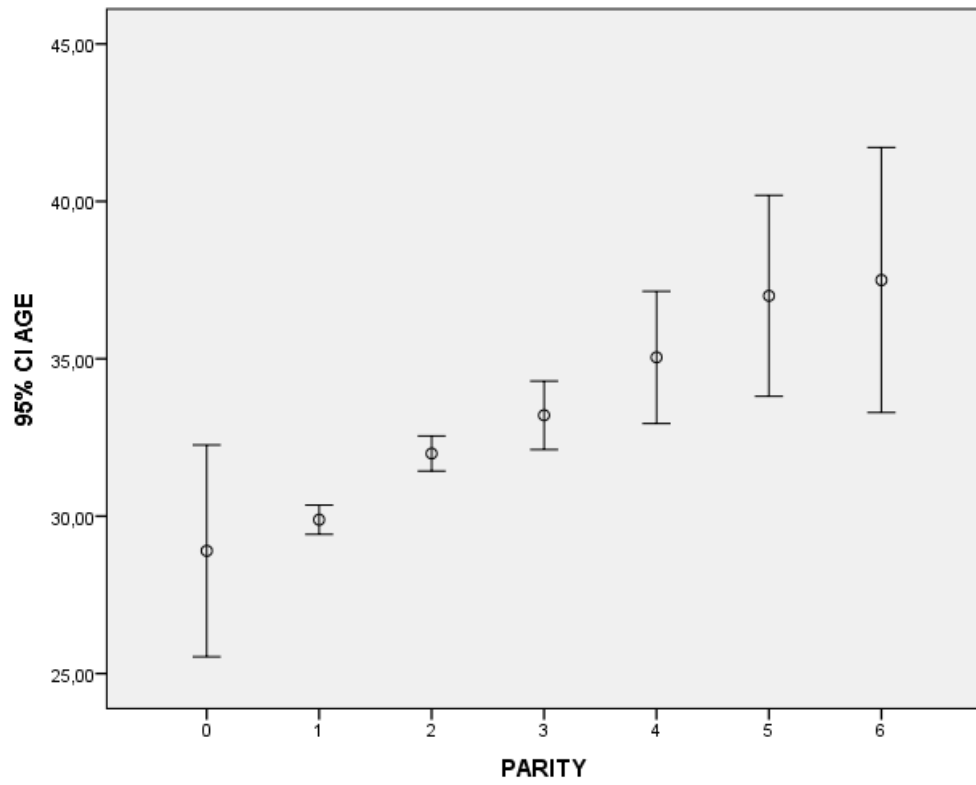

Supplementary Figure 2: Parity plotted against age (years): circles represent means, vertical bars 95% C.I.s
